# Supplementary material for: Diacetylene bridged triphenylamines as hole transport materials for solid state dye sensitized solar cells
Source: Royal Society of Chemistry journal article supplement (doi:10.1039/c3ta11417a), 2013-01-01

# Supporting Information

## Diacetylene Bridged Triphenylamines as Hole Transport Materials for Solid State Dye Sensitized Solar Cells

*Miquel Planells,<sup>a‡</sup> Antonio Abate,<sup>b‡</sup> Derek J. Hollman,<sup>b</sup> Vishal Bharti,<sup>c</sup> Jitender Gaur,<sup>c</sup> Dibyajyoti Mohanty<sup>c</sup>, Suresh Chand,<sup>c</sup> Henry J. Snaith<sup>b</sup> and Neil Robertson<sup>a</sup>*

<sup>a</sup>EastChem – School of Chemistry, University of Edinburgh, West Mains Road, Edinburgh EH9 3JJ

<sup>b</sup>Department of Physics, University of Oxford, Oxford OX1 3PU, U.K.

<sup>c</sup>CSIR-National Physical Laboratory, Dr. K.S. Krishnan Marg, New Delhi-110012, India

<sup>‡</sup> These authors contributed equally.

### TABLE OF CONTENTS

Supporting information figures:

|                                                               |        |
|---------------------------------------------------------------|--------|
| - Cyclic voltammetries of DATPA derivatives and Spiro-OMeTAD  | - S2 - |
| - Cyclic and differential pulse voltammetry scans of D102 dye | - S3 - |
| - Transmittance of nanostructured TiO <sub>2</sub>            | - S3 - |
| - Absorption spectrum of D102 onto TiO <sub>2</sub>           | - S4 - |
| - Four point conductivity measurement                         | - S4 - |

Supporting information tables:

|                                                 |        |
|-------------------------------------------------|--------|
| - Calculated HOMO energies of DATPA derivatives | - S5 - |
| - Charge transport parameters                   | - S5 - |

|                                               |        |
|-----------------------------------------------|--------|
| Detailed description of mobility measurements | - S6 - |
|-----------------------------------------------|--------|

|                                                |        |
|------------------------------------------------|--------|
| <sup>1</sup> H and <sup>13</sup> C NMR spectra | - S7 - |
|------------------------------------------------|--------|

|                                                                                                           |         |
|-----------------------------------------------------------------------------------------------------------|---------|
| Fluorescence lifetime of D102 on Al <sub>2</sub> O <sub>3</sub> in absence of any of the hole conductors. | - S11 - |
|-----------------------------------------------------------------------------------------------------------|---------|

## Supporting Information Figures

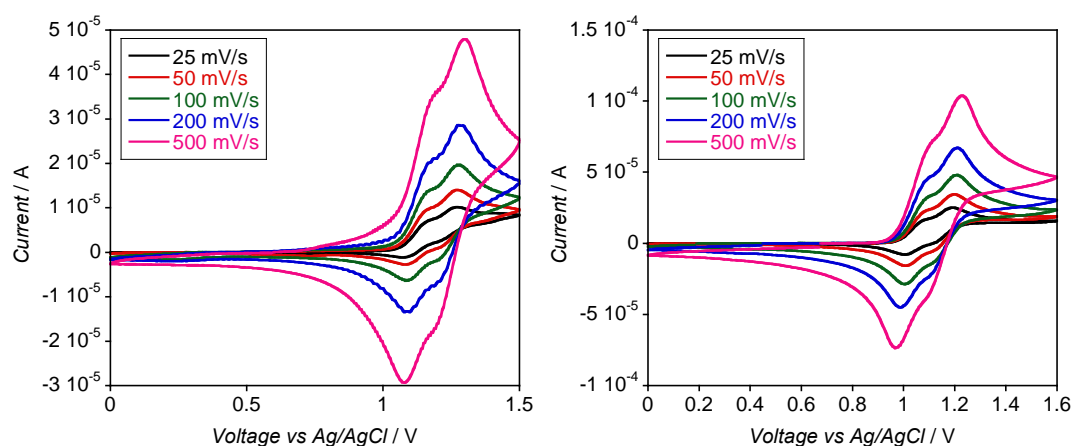

**Figure S1.** Cyclic voltammetry traces at different scan rates of **H-DATPA** (left) and **Me-DATPA** (right).

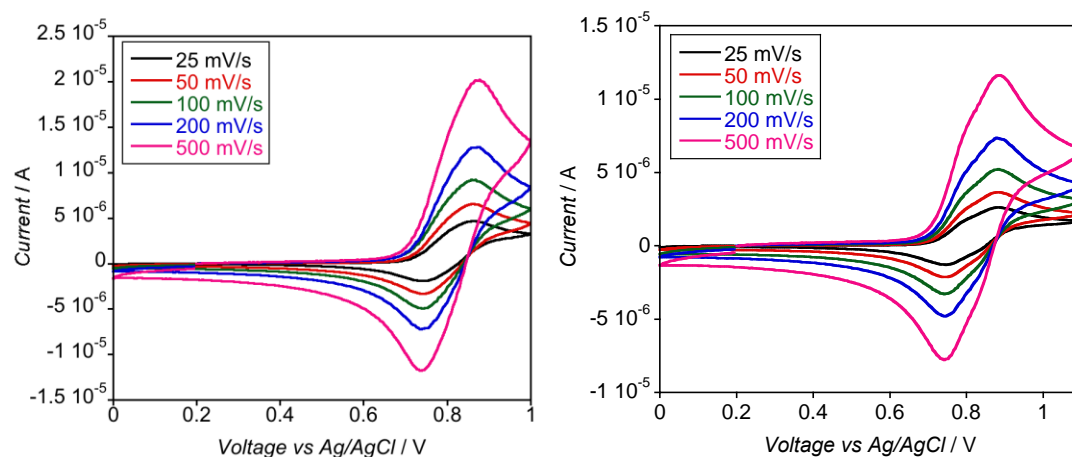

**Figure S2.** Cyclic voltammetry traces at different scan rates of **MeS-DATPA** (left) and **MeO-DATPA** (right). Note that the two-oxidation process can barely be observed, and therefore, pulse voltammetry techniques must be used.

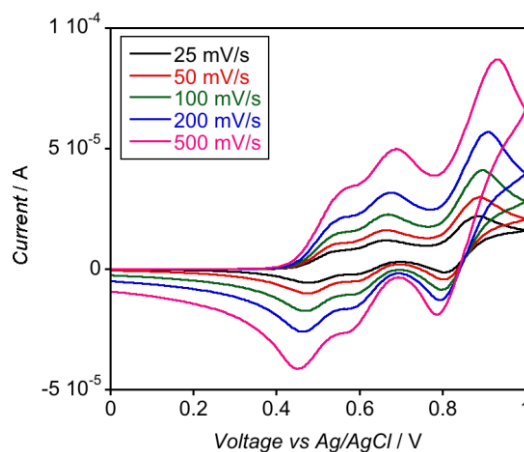

**Figure S3.** Cyclic voltammetry traces at different scan rates of Spiro-OMeTAD.

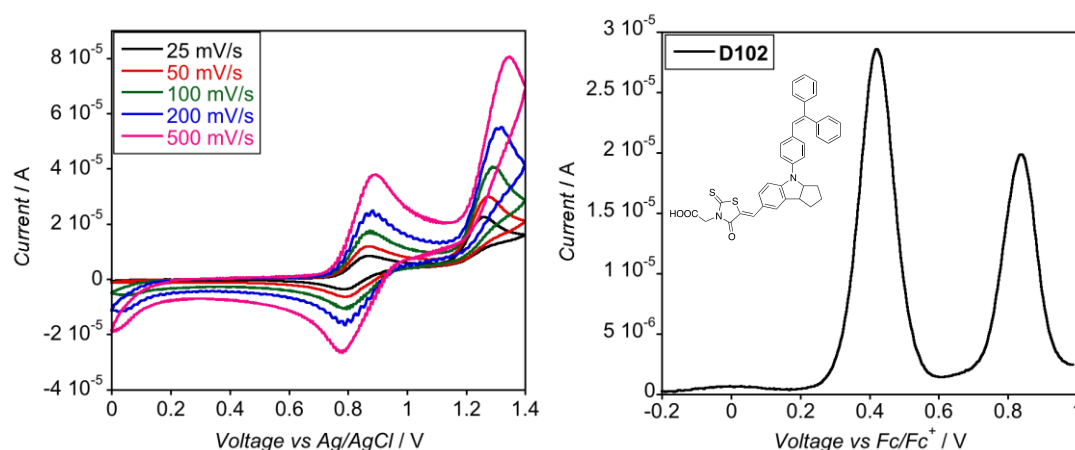

**Figure S4.** Cyclic voltammetry at different scan rates (*left*) and square-wave voltammetry (*right*) traces of **D102** dye in CH<sub>2</sub>Cl<sub>2</sub> solution.

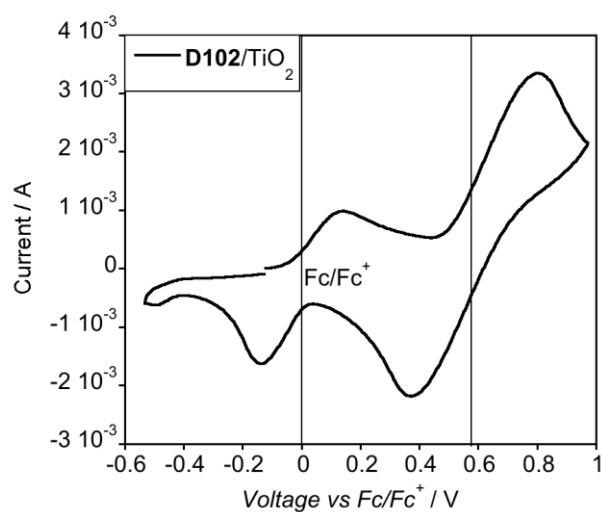

**Figure S5.** Cyclic voltammetry of **D102** anchored onto mesoporous TiO<sub>2</sub> nanoparticles. Square-wave voltammetry could not be measured due to high intense signal.

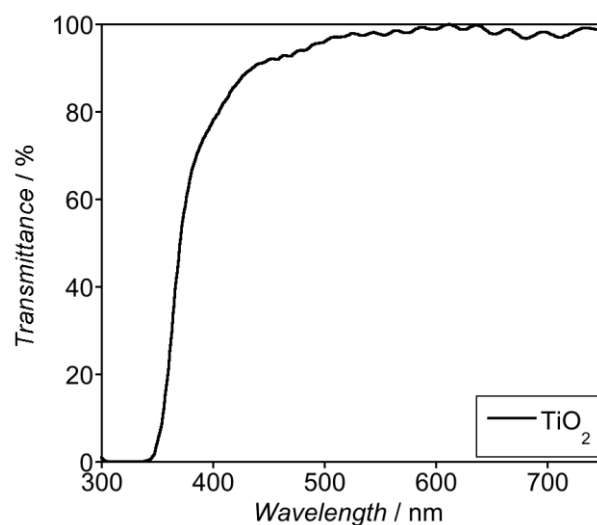

**Figure S6.** Transmittance of TiO<sub>2</sub> mesoporous film.

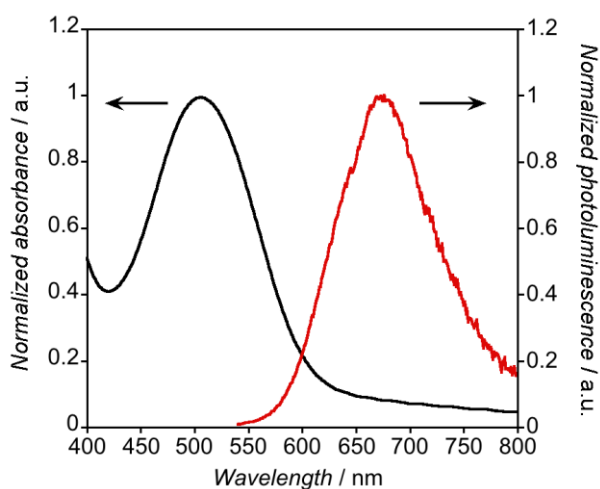

**Figure S7.** Absorption (black line) and emission (red line) spectra of **D102** anchored onto mesoporous  $\text{TiO}_2$  nanoparticles.

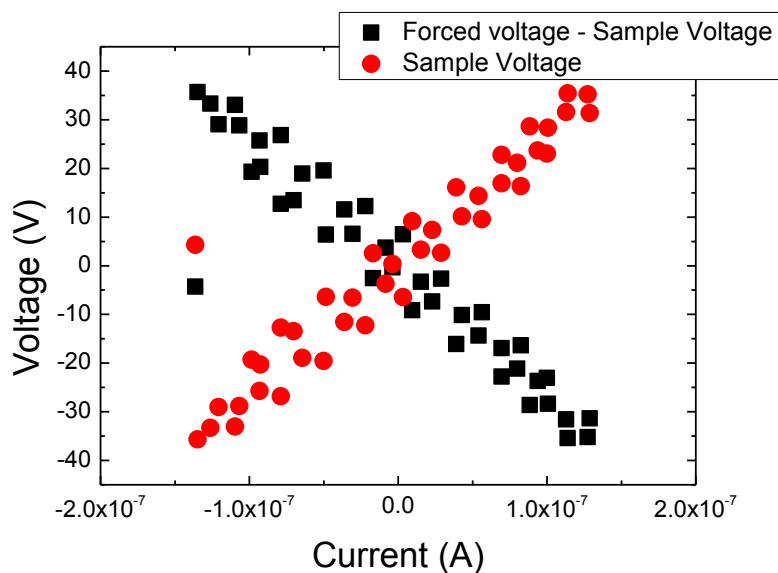

**Figure S8.** Four point conductivity measurements for Spiro-OMeTAD (with and without LiTFSI) have been used to estimate the contact resistance according to the previous report *J. Appl. Phys.* **2004**, *96*, 7312.

### Supporting Information Tables

**Table S1.** HOMO energies of DATPA derivatives obtained by DFT calculations performed at B3LYP/6-31G(d) level of theory *versus* experimental values from electrochemical measurements.

|                  | DFT ( <i>gas phase</i> ) | DFT ( <i>CH<sub>2</sub>Cl<sub>2</sub></i> ) | Experimental |
|------------------|--------------------------|---------------------------------------------|--------------|
| <b>H-DATPA</b>   | -4.75 eV                 | -4.92 eV                                    | -5.33 eV     |
| <b>Me-DATPA</b>  | -4.63 eV                 | -4.83 eV                                    | -5.23 eV     |
| <b>MeS-DATPA</b> | -4.61 eV                 | -4.77 eV                                    | -5.14 eV     |
| <b>MeO-DATPA</b> | -4.52 eV                 | -4.69 eV                                    | -5.02 eV     |

**Table S2.** Charge transport parameters in the samples generated by theoretical fitting of experimental curves reported in the main text. Carrier mobility  $\mu$ , effective density of states  $N_v$ , total trap density  $H_b$  and characteristic trap energy  $E_t$ .

|                     | $\mu$ (cm <sup>2</sup> V <sup>-1</sup> s <sup>-1</sup> ) | $N_v$ (cm <sup>-3</sup> ) | $H_b$ (cm <sup>-3</sup> ) | $E_t$ (meV) |
|---------------------|----------------------------------------------------------|---------------------------|---------------------------|-------------|
| <b>H-DATPA</b>      | 3.0 x 10 <sup>-6</sup>                                   | 1 x 10 <sup>19</sup>      | 5.5 x 10 <sup>18</sup>    | 40          |
| <b>Me-DATPA</b>     | 2.8 x 10 <sup>-6</sup>                                   | 1 x 10 <sup>19</sup>      | 6.0 x 10 <sup>18</sup>    | 51          |
| <b>MeS-DATPA</b>    | 4.0 x 10 <sup>-6</sup>                                   | 1 x 10 <sup>19</sup>      | 1.6 x 10 <sup>18</sup>    | 91          |
| <b>MeO-DATPA</b>    | 6.0 x 10 <sup>-6</sup>                                   | 1 x 10 <sup>19</sup>      | 7.0 x 10 <sup>17</sup>    | 88          |
| <b>Spiro-OMeTAD</b> | 3.6 x 10 <sup>-4</sup>                                   | 1 x 10 <sup>19</sup>      | 4.0 x 10 <sup>18</sup>    | 32          |

## Detailed description of mobility measurements

Earlier studies in organics have shown that the space-charge limited current (SCLC) governs the charge transport either by drift of charge carriers under the influence of traps, distributed in energy and space-called trap model or by temperature and field dependent mobility models. Due to the low mobility of charge carriers in organic semiconductors, the injected carrier forms a space charge. This space charge creates a field that opposes the applied bias and thus decreases the voltage drop across junction; as a result SCLC have been proposed as the dominant conduction mechanism in organic semiconductors. Ohmic conduction at low fields can be described by:

$$J = qnm\frac{V}{d} \quad (1)$$

where,  $q$  is the electronic charge,  $n$  is the carrier density,  $\mu$  is the carrier mobility,  $d$  is the thickness of the film.

SCLC theory with an exponential trap distribution proposes that the space charge that limits conduction is stored in the traps. Assuming that the trapped carrier density ( $p_t$ )  $\gg$  free carrier density ( $p$ ) and using continuity equation and boundary condition for current density ( $J$ ) and applied voltage ( $V$ ) as:

$$J = qmp(x)F(x) \quad (2)$$

$$V = \int_0^d F(x) dx \quad (3)$$

the expression for  $J$ , for traps ( $N_t$ ) distributed exponentially in energy ( $E$ ) as:

$$N_t(E) = \left( \frac{H_b}{E_t} \right) e^{\left( -\frac{E}{E_t} \right)} \quad (4)$$

is given by:

$$J = q^{1-l} m N_v \left( \frac{2l+1}{l+1} \right)^{l+1} \left( \frac{l e \epsilon_0}{(l+1) H_b} \right)^l \frac{V^{l+1}}{d^{2l+1}} \quad (5)$$

where  $N_v$  is the effective density of states,  $\epsilon$  is the dielectric constant of material,  $\epsilon_0$  is the permittivity of the free space,  $N(E)$  is the distribution function of hole trap density at an energy level  $E$  above the valence band edge,  $H_b$  is the total trap density at the edge of valence band,  $E_t$  is the characteristic trap energy that is often expressed in terms of the characteristic temperature of trap distribution  $T_C$  as:

$$E_t = k_B T_C \quad (6)$$

$$l = \frac{E_t}{k_B T} = \frac{T_C}{T} \quad (7)$$

where  $k_B$  is the Boltzmann constant and the parameter  $l$  determines the distribution of traps in the forbidden gap.

The experimental data has been analyzed in terms of SCLC by generating theoretical curves using equation 5. The theoretical curves generated have been found to fit quite well the experimental data establishing explicitly that the charge transport in all the four samples is governed by trap limited SCLC where traps are distributed in energy and space.



$^1\text{H}$ -NMR of **10**

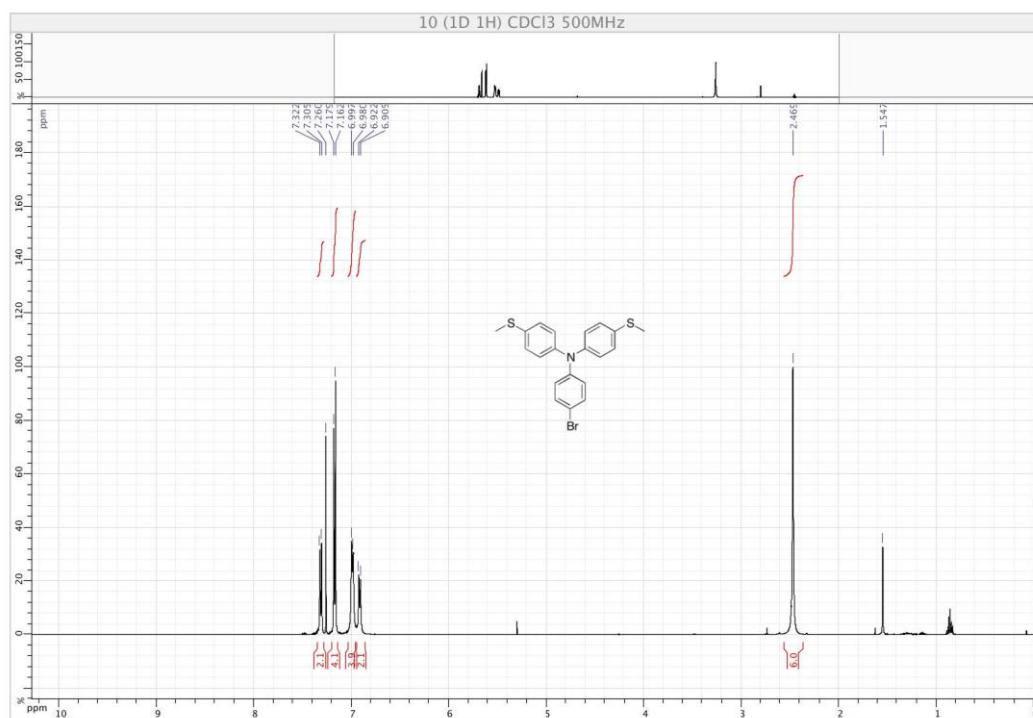

$^{13}\text{C}$ -NMR of **10**

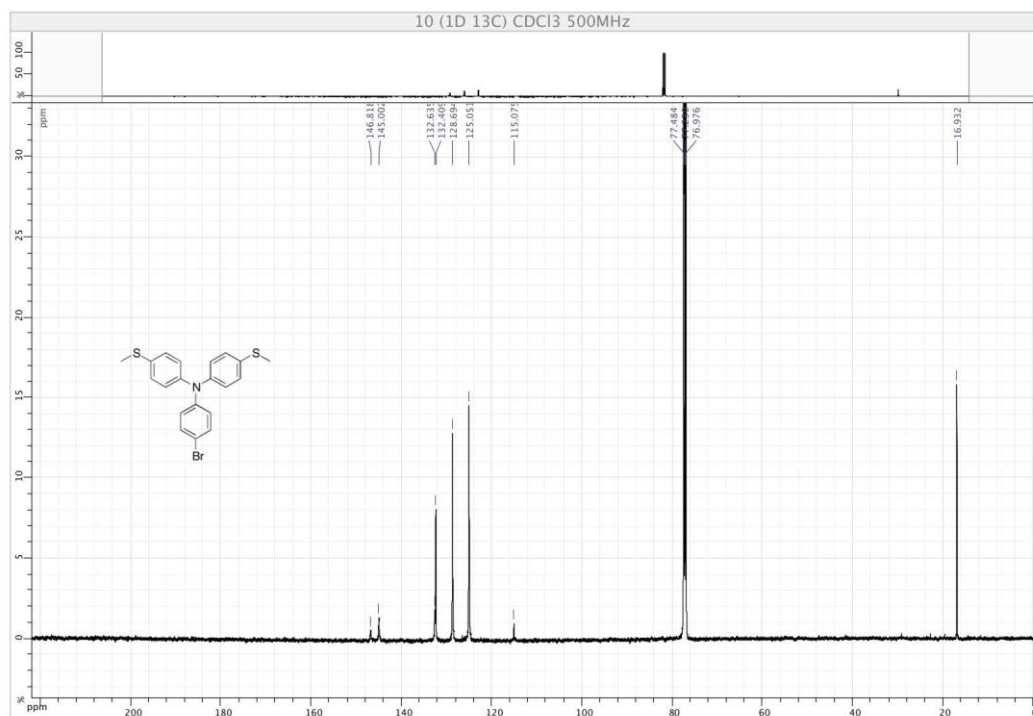



<sup>1</sup>H-NMR of **11**

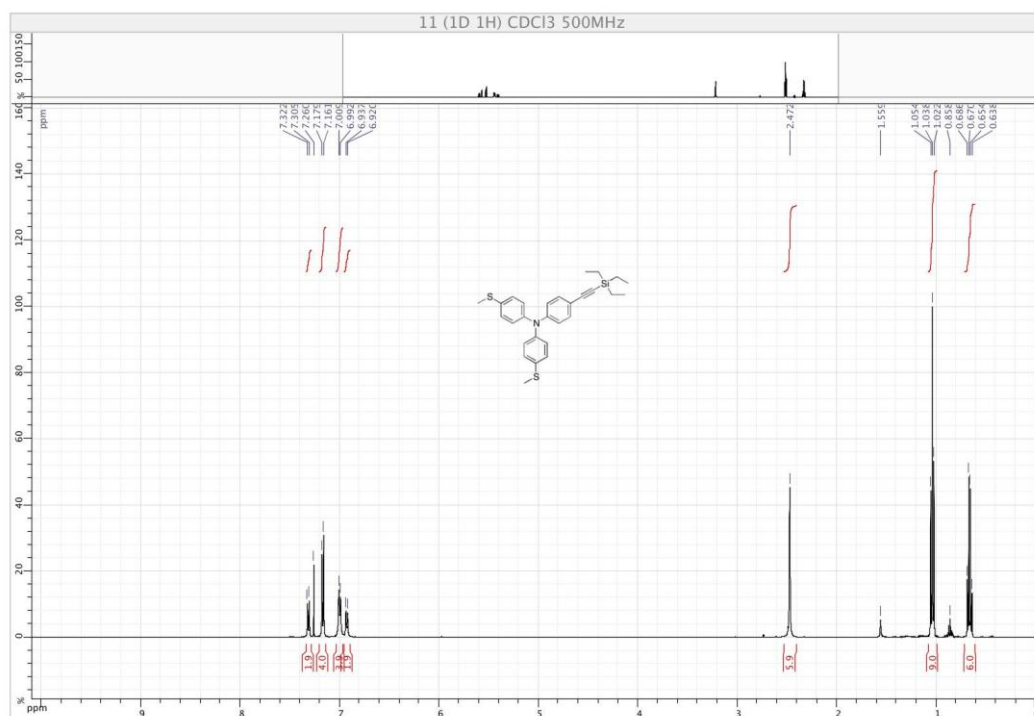

<sup>13</sup>C-NMR of **11**

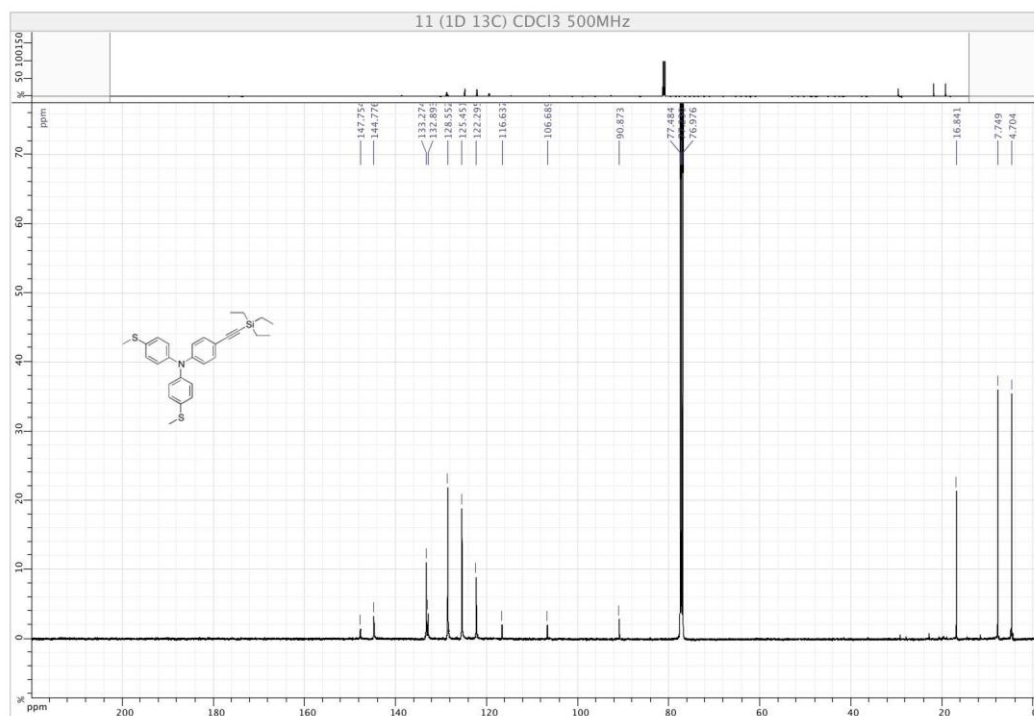

<sup>1</sup>H-NMR of **12**

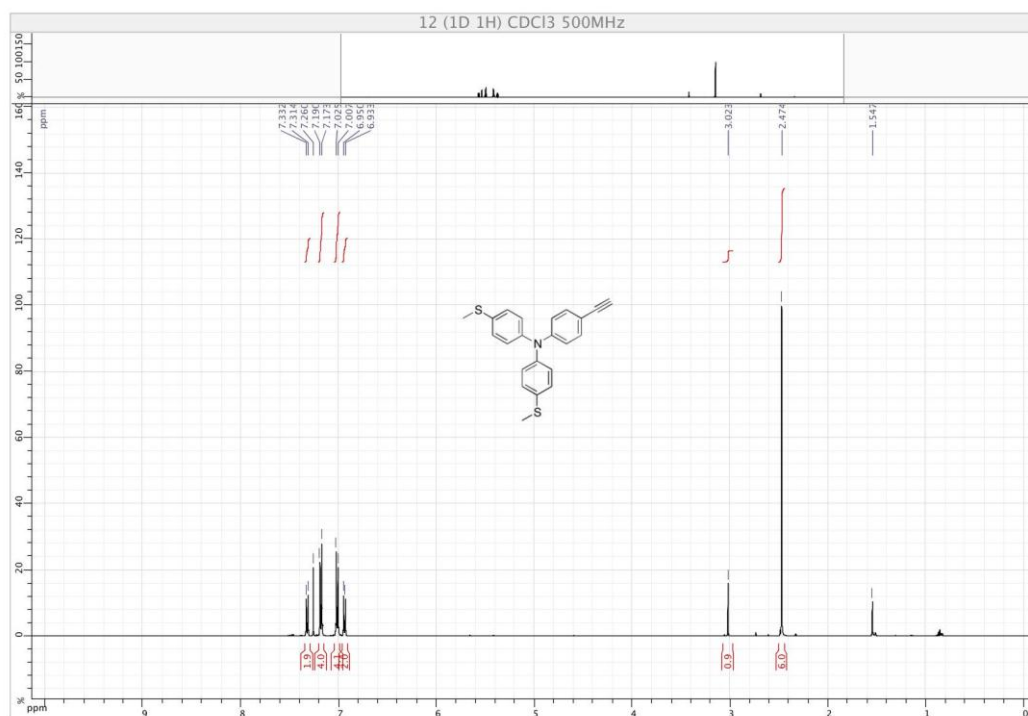

<sup>13</sup>C-NMR of **12**

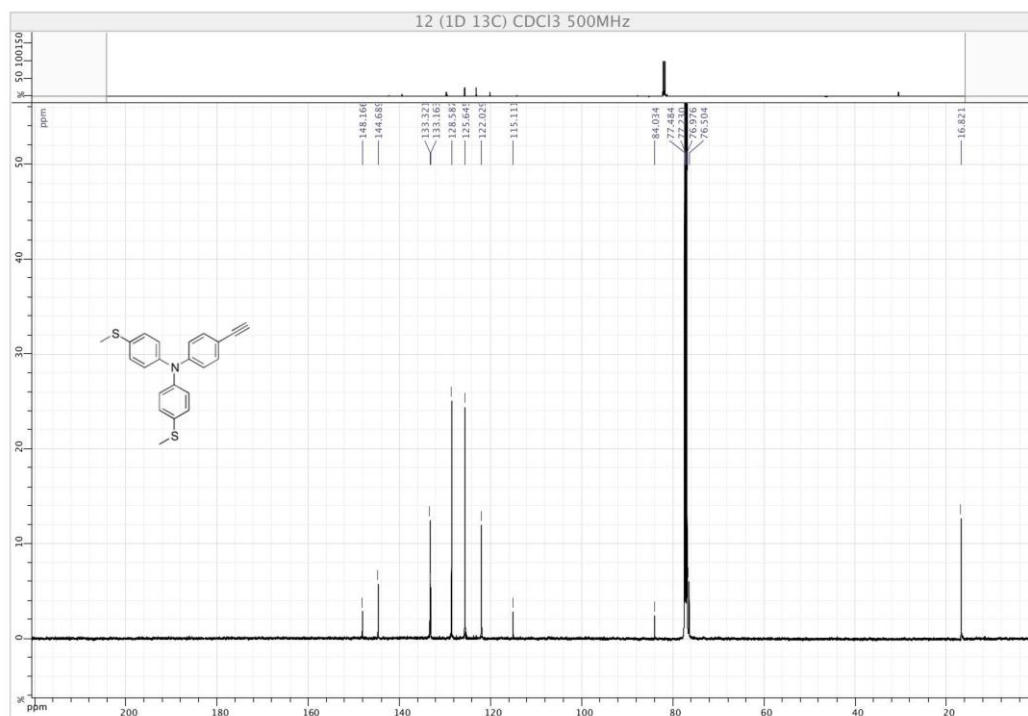

**Fluorescence lifetime of D102 on Al<sub>2</sub>O<sub>3</sub> in absence of any of the hole conductors**

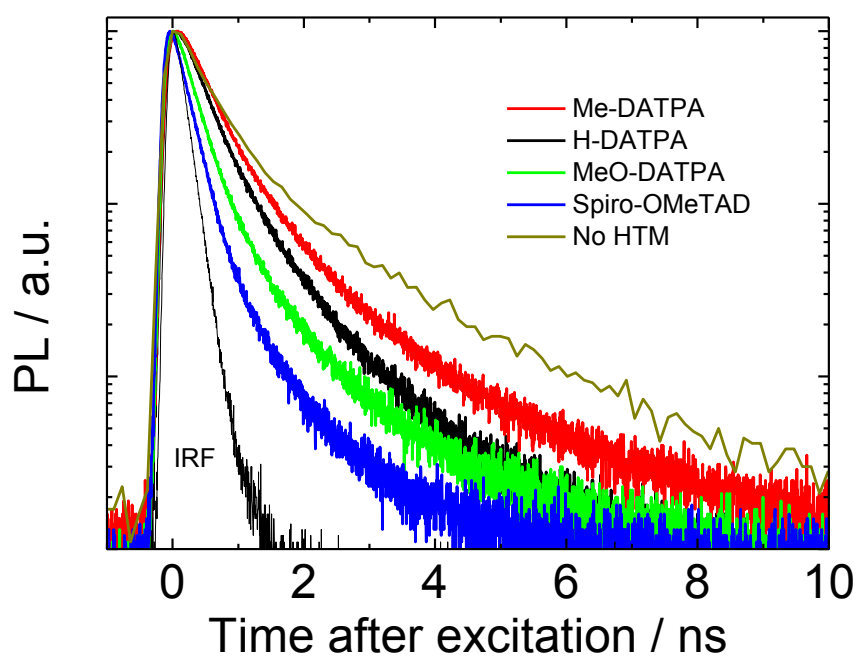

Supplement: c3ta11417a.pdf [file c3ta11417a.pdf]
